# Supplementary material for: Site of breast cancer metastasis is independent of single nutrient levels
Source: PubMed Central journal article supplement — bioRxiv. 2024 Oct 25:2024.10.24.616714. Preprint. [Version 1] doi: 10.1101/2024.10.24.616714 (PMC11527034; doi:10.1101/2024.10.24.616714), 2024-10-25

# Extended Data Figure 1

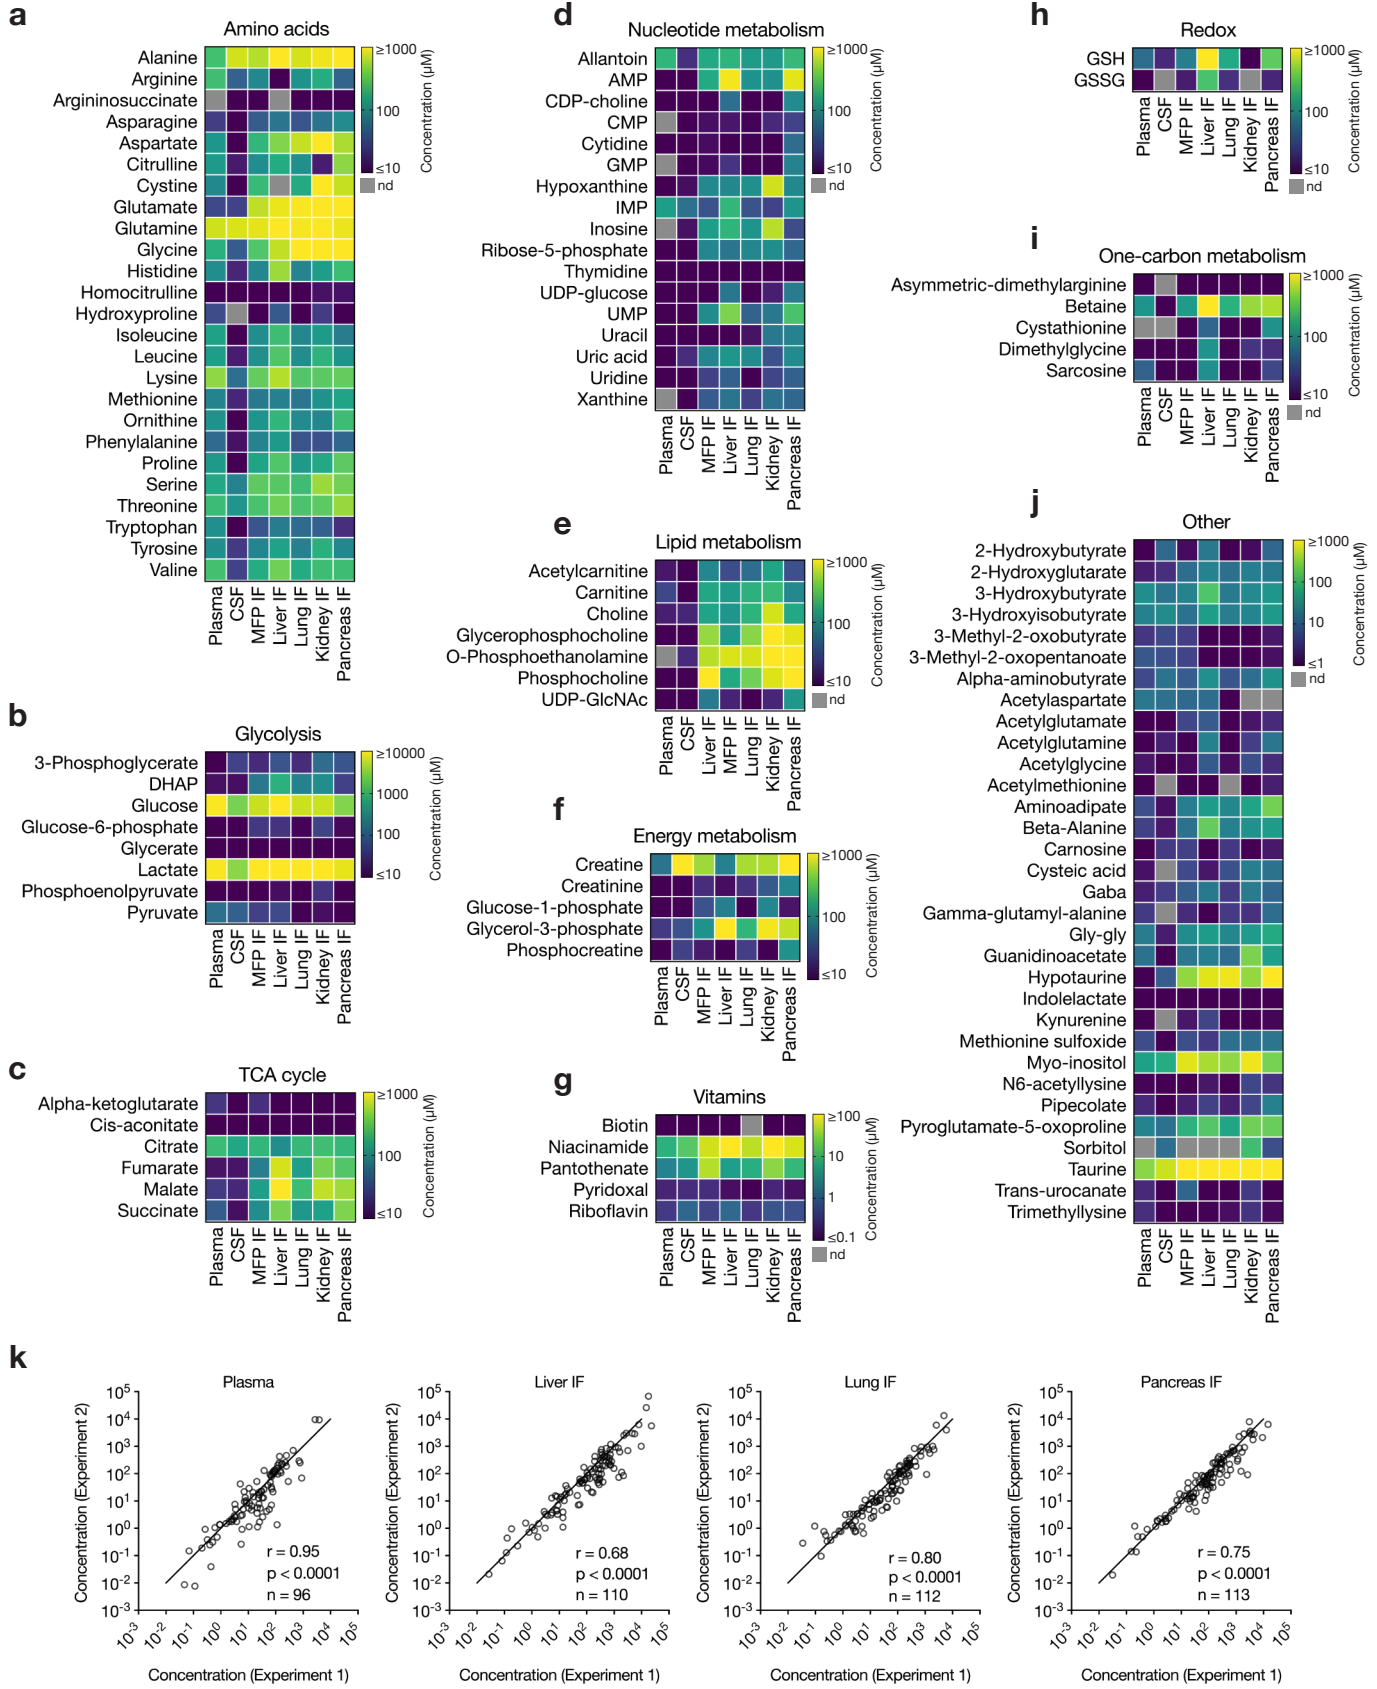

# Extended Data Figure 2

**a**

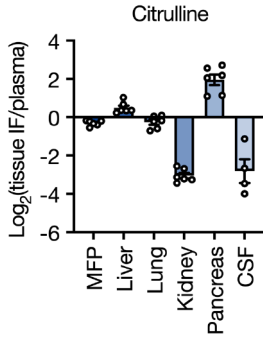

**b**

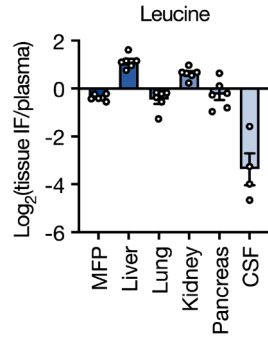

**c**

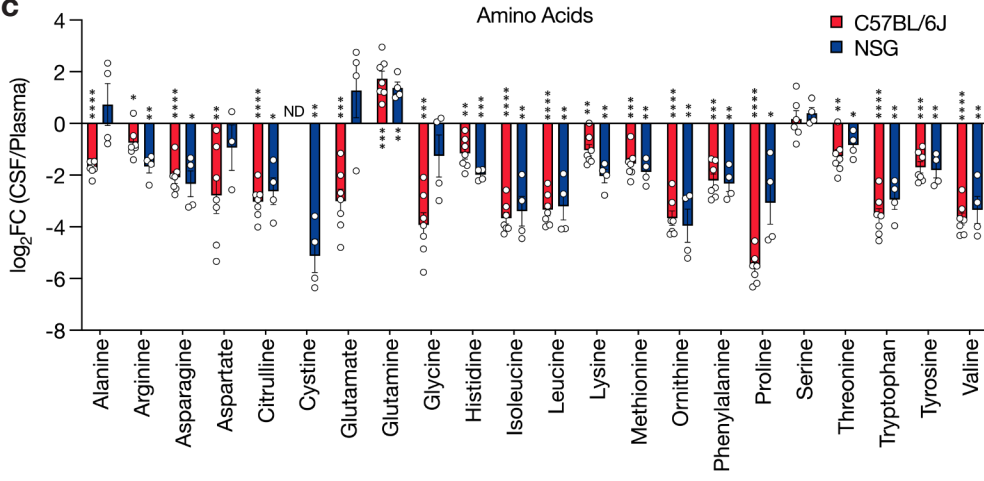

**d**

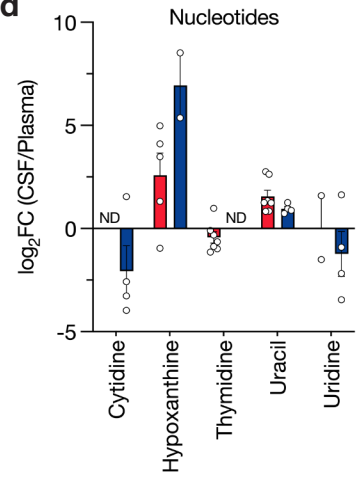

# Extended Data Figure 3

**a**

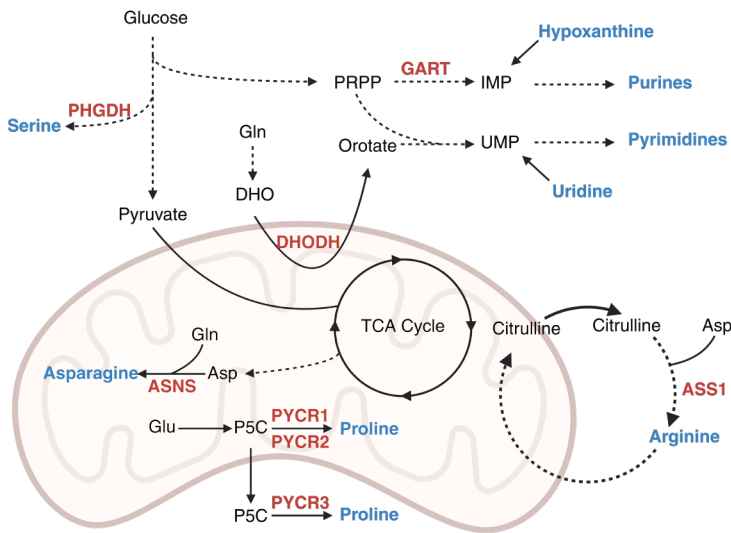

**b**

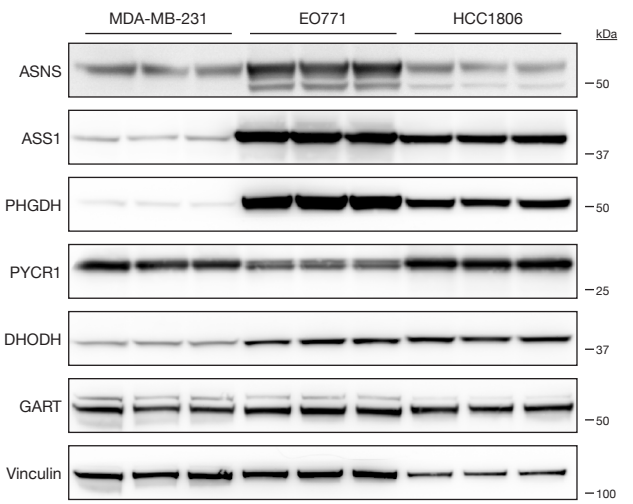

**c**

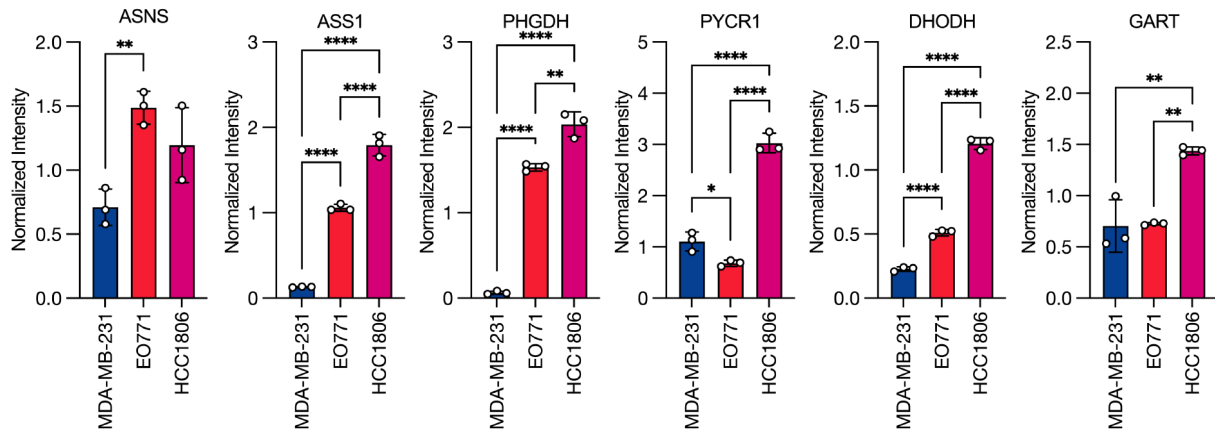

# Extended Data Figure 4

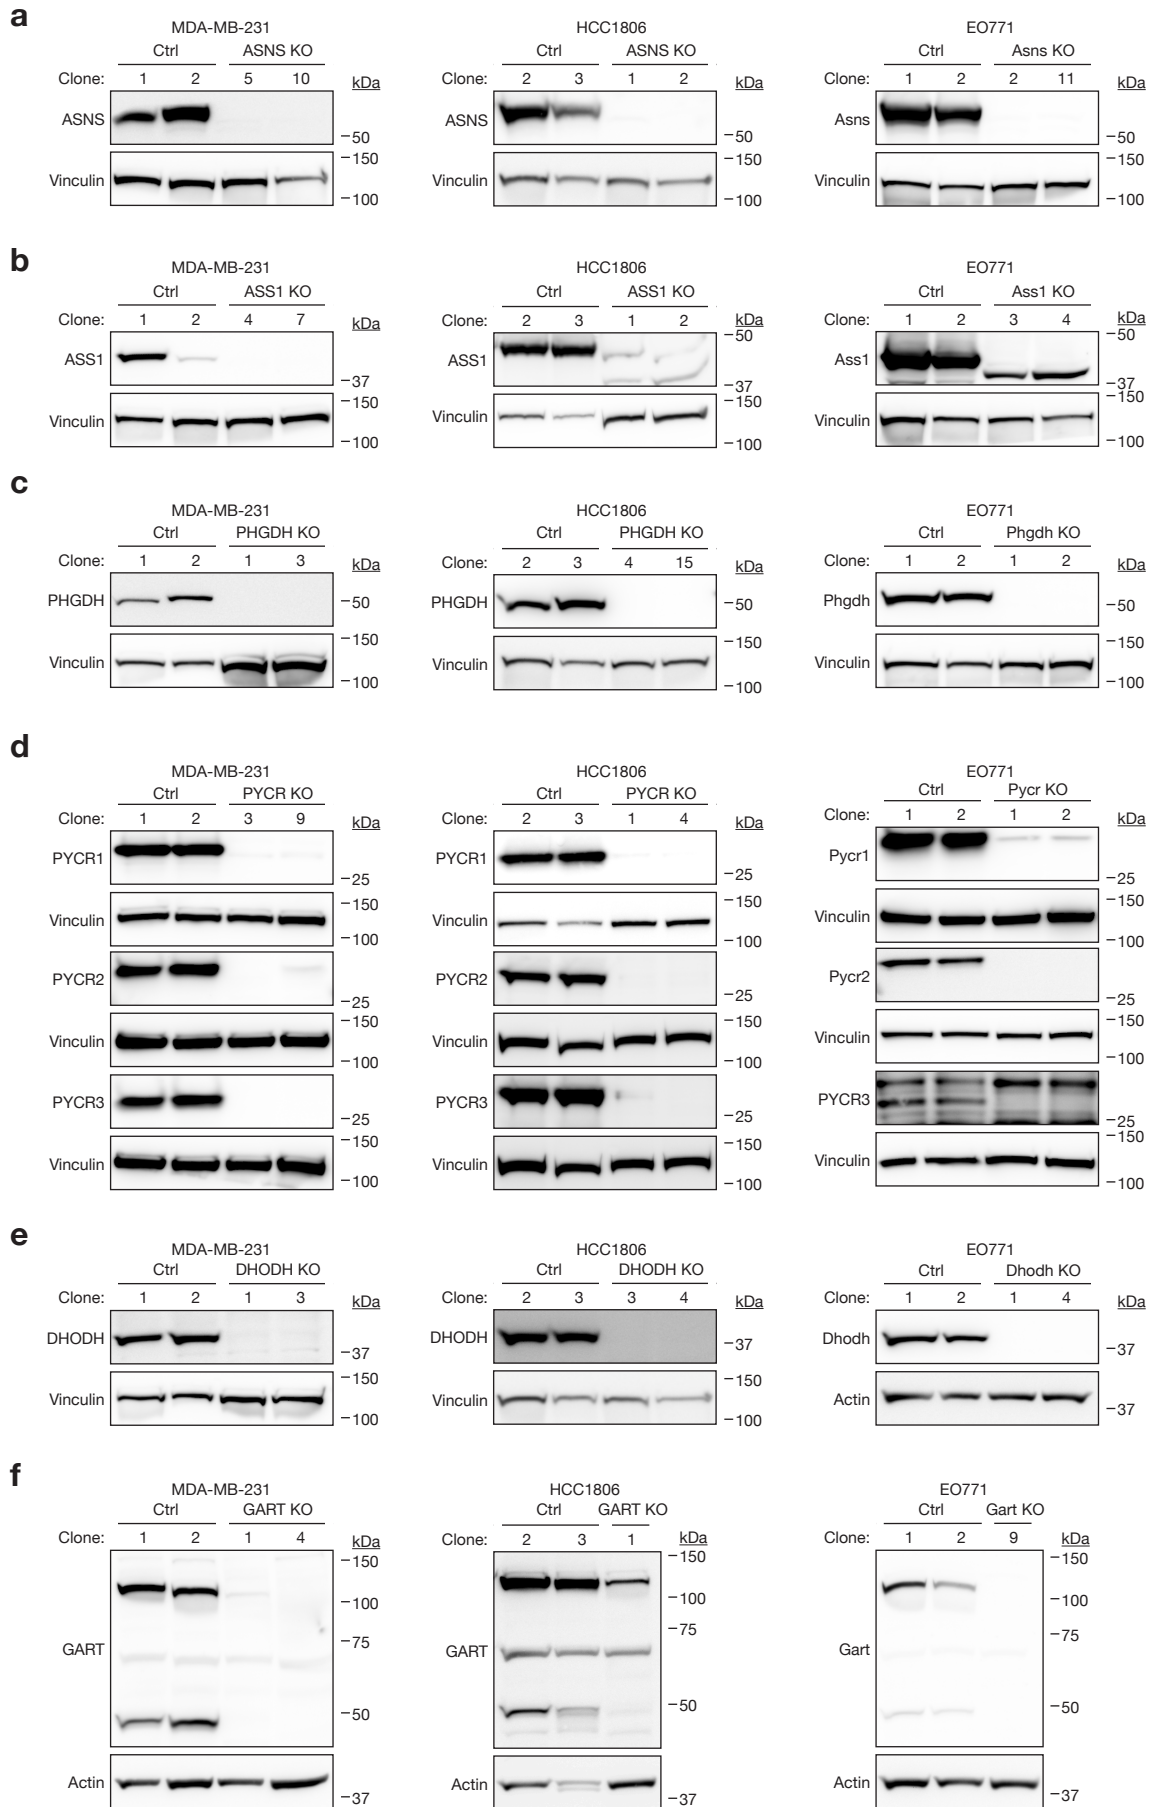

# Extended Data Figure 5

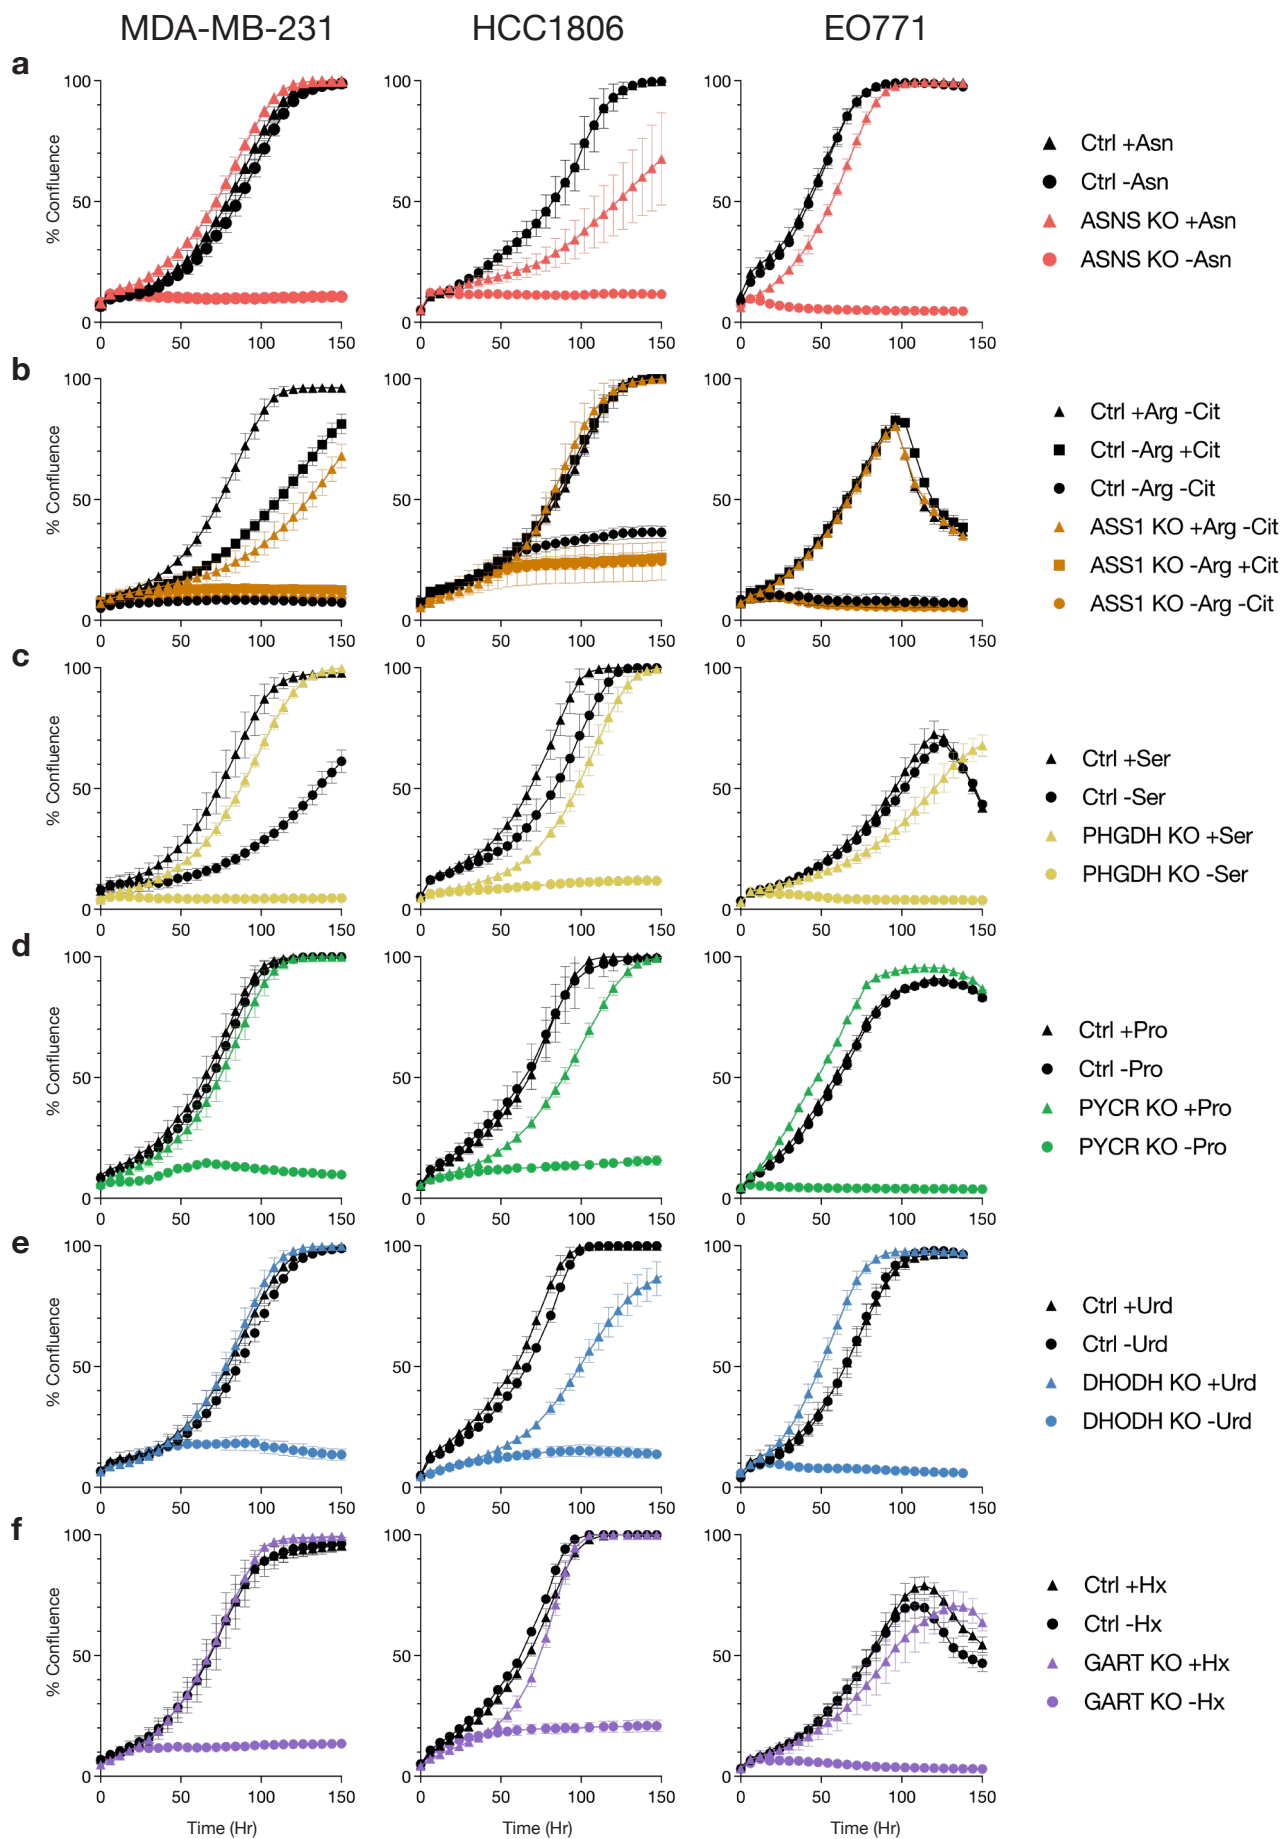

# Extended Data Figure 6

**a**

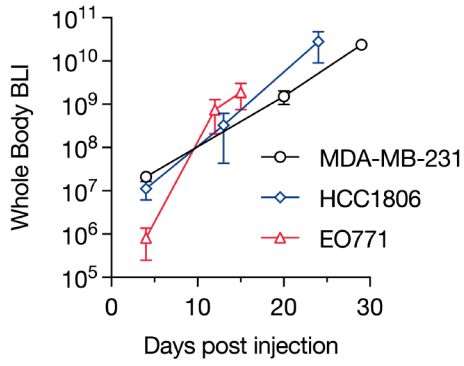

**b**

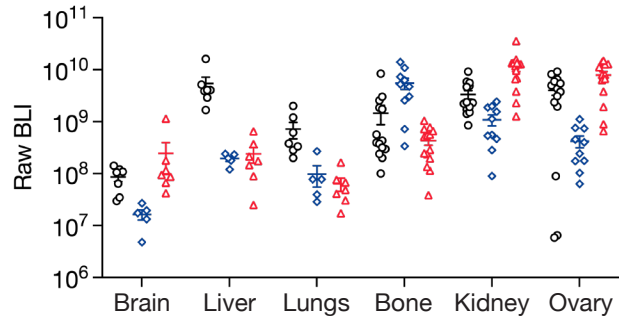

**c**

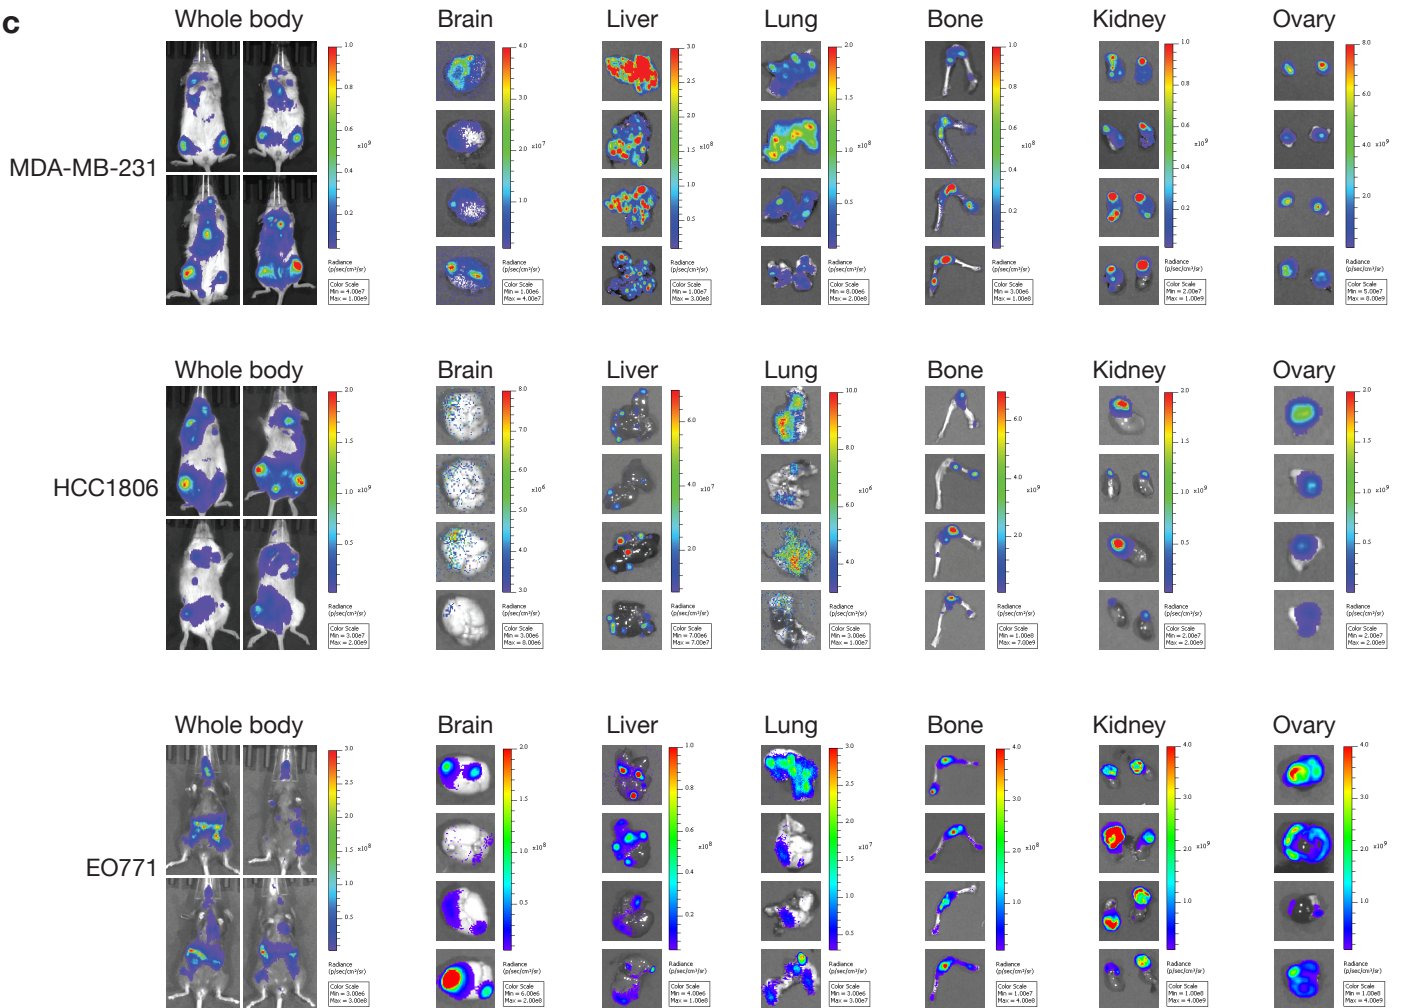

# Extended Data Figure 7

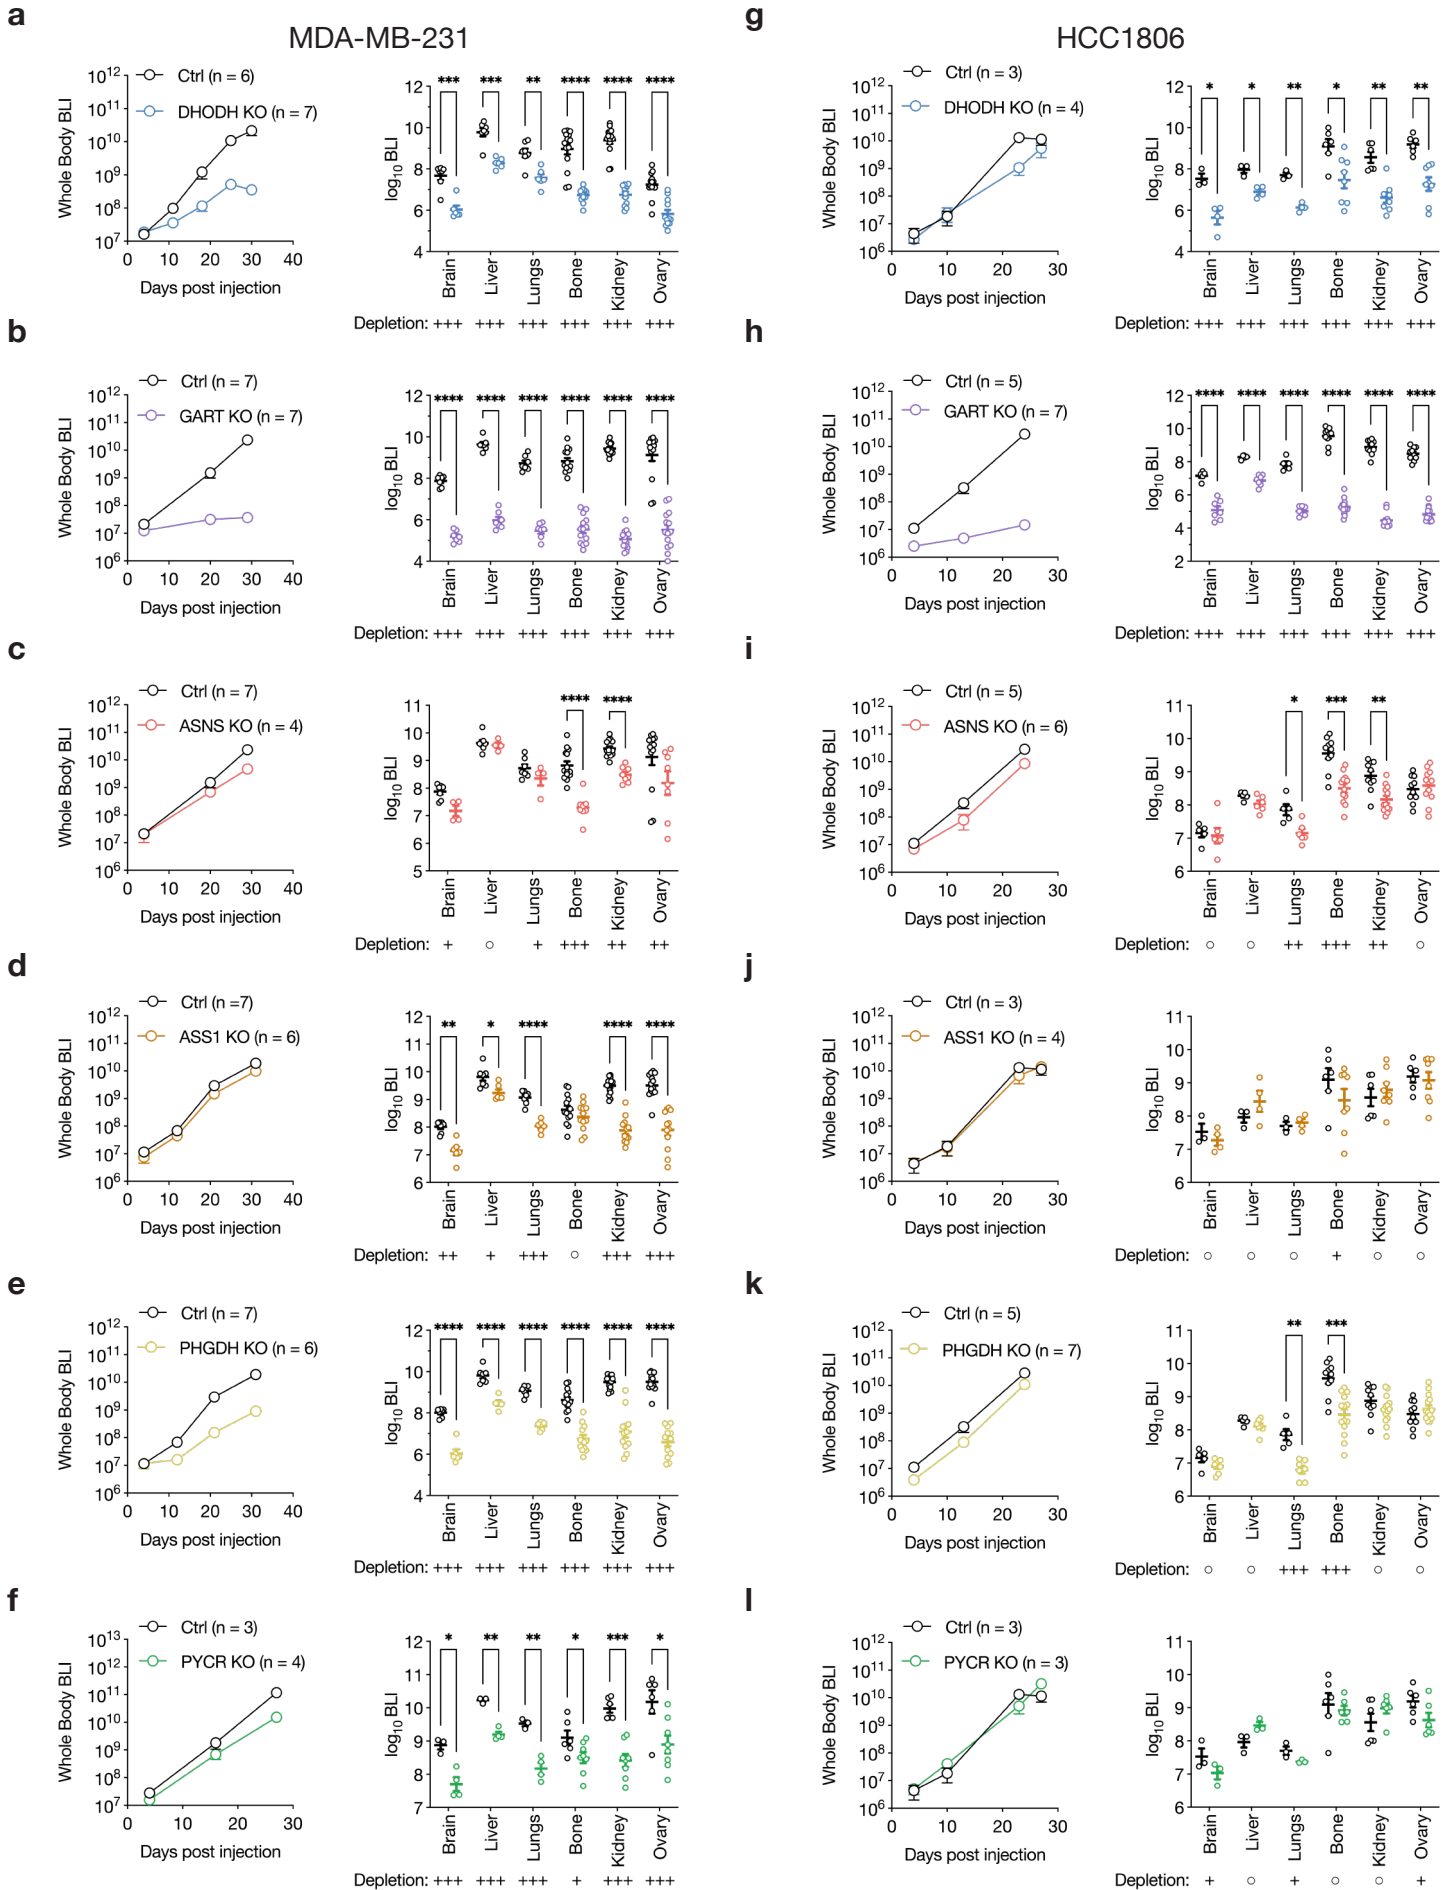

# Extended Data Figure 8

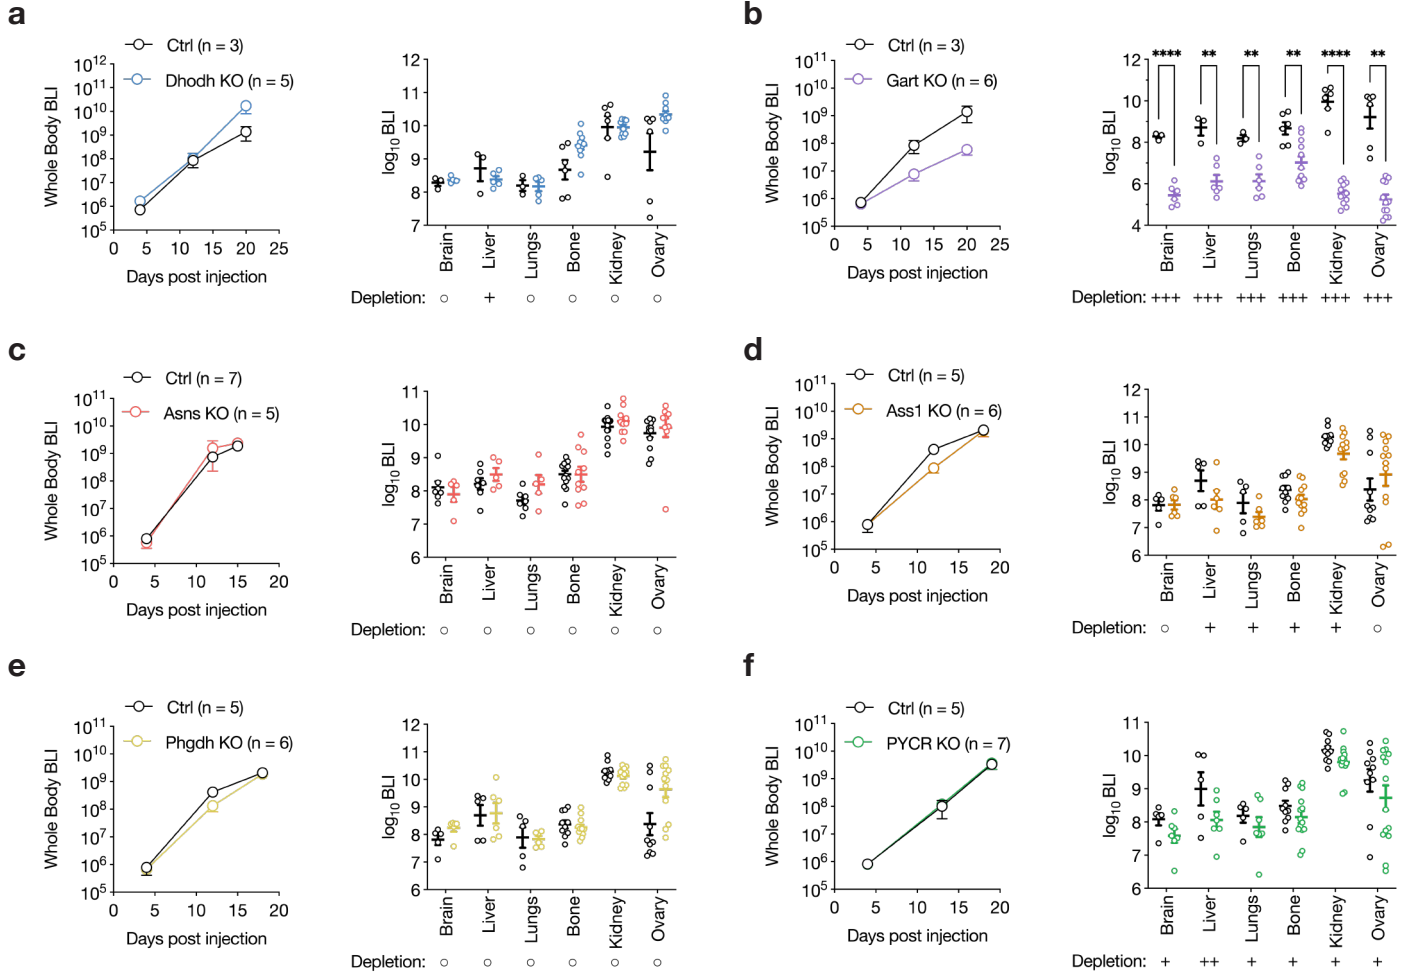



# Extended Data Figure 9

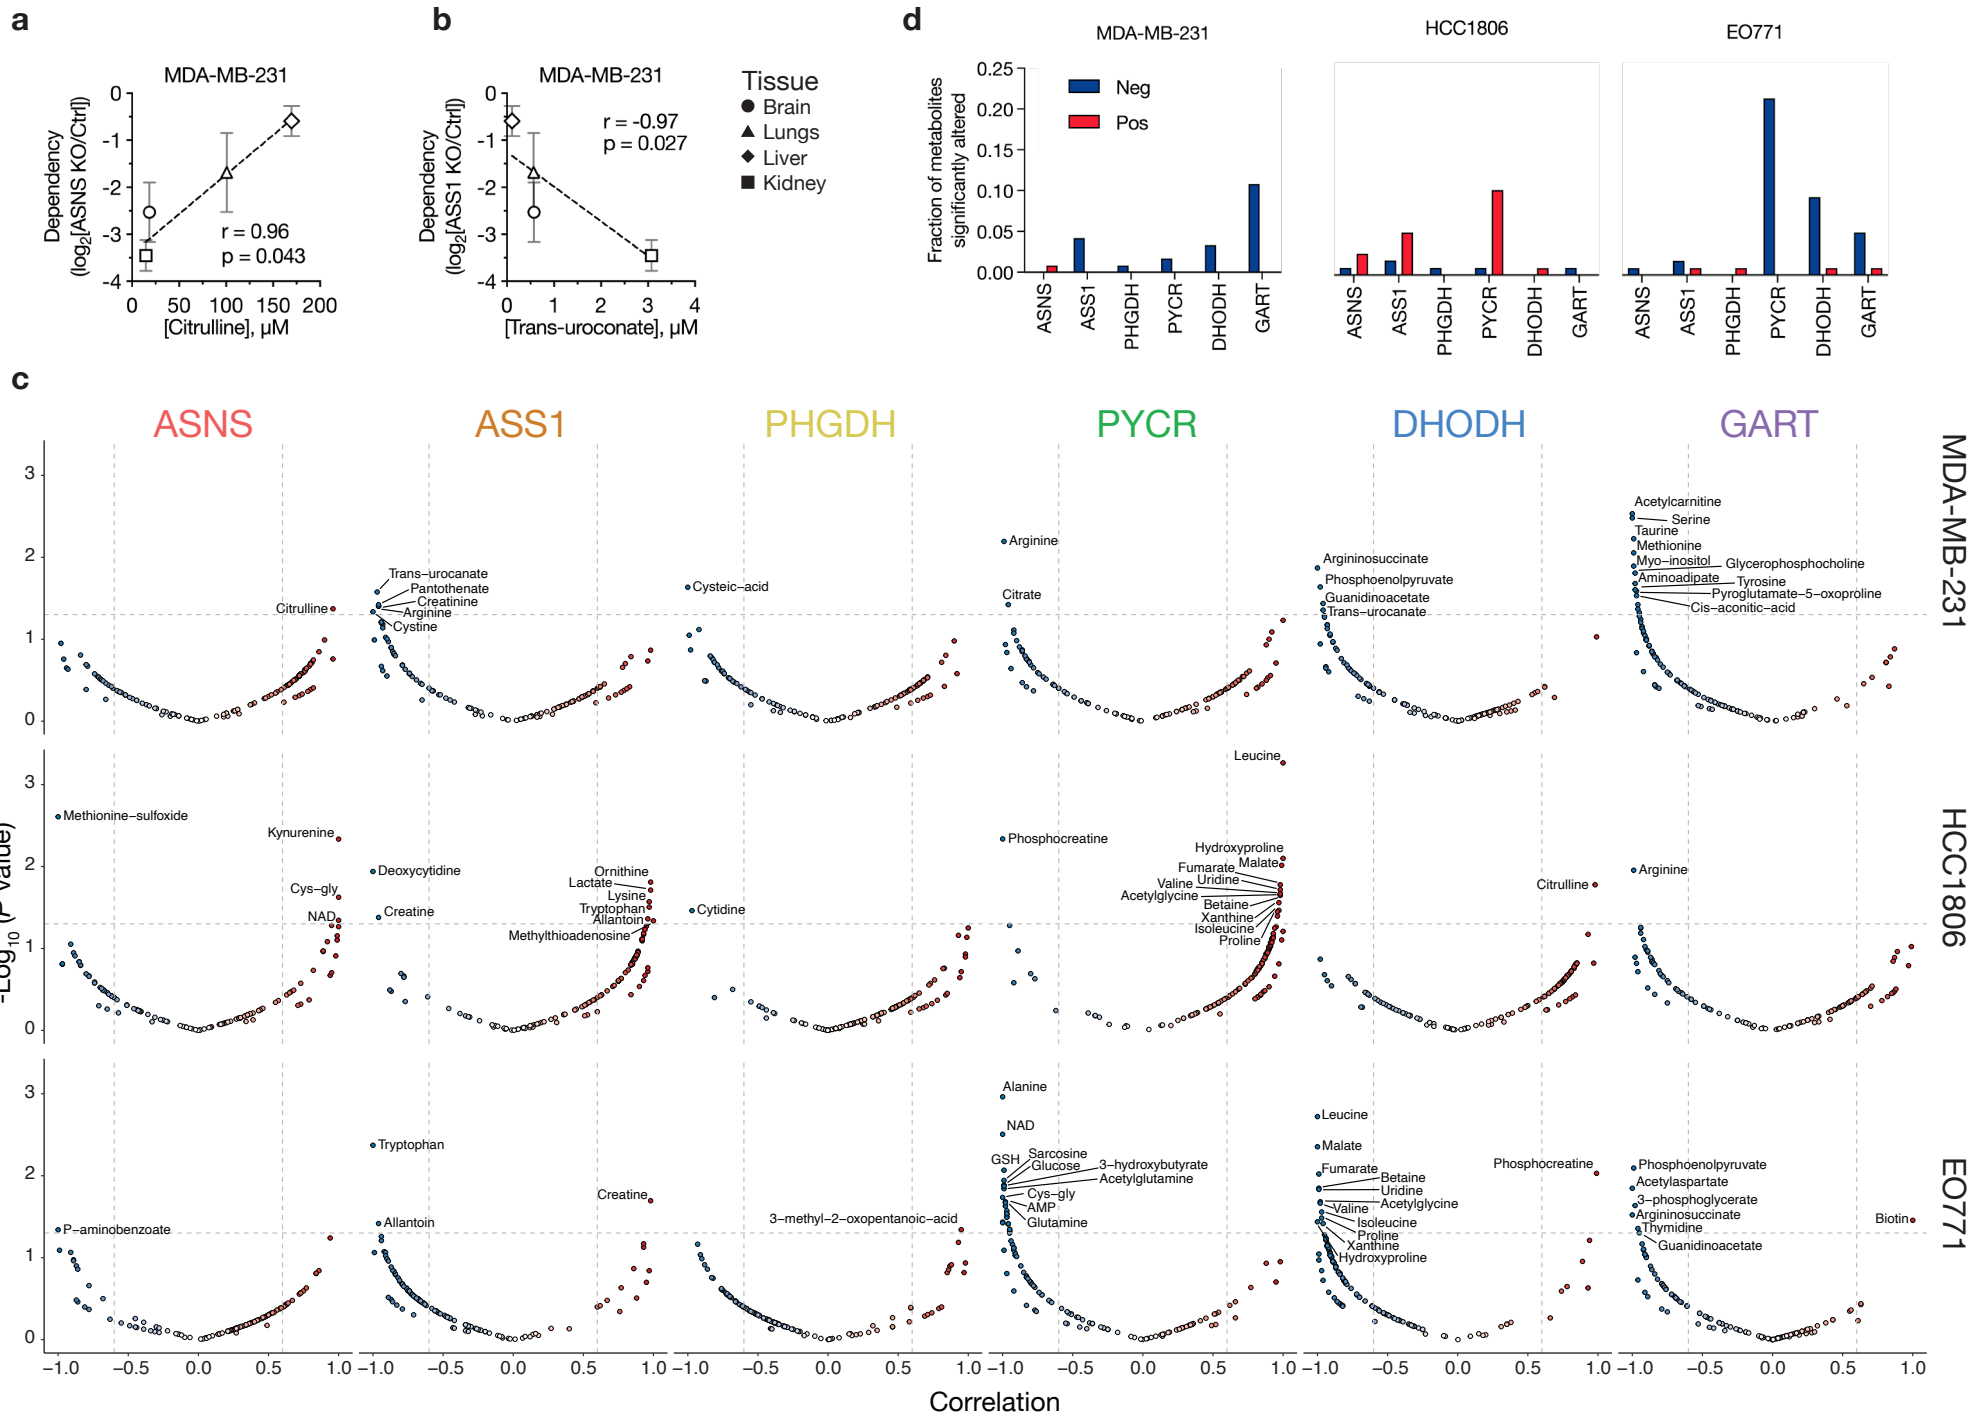

# Extended Data Figure 10

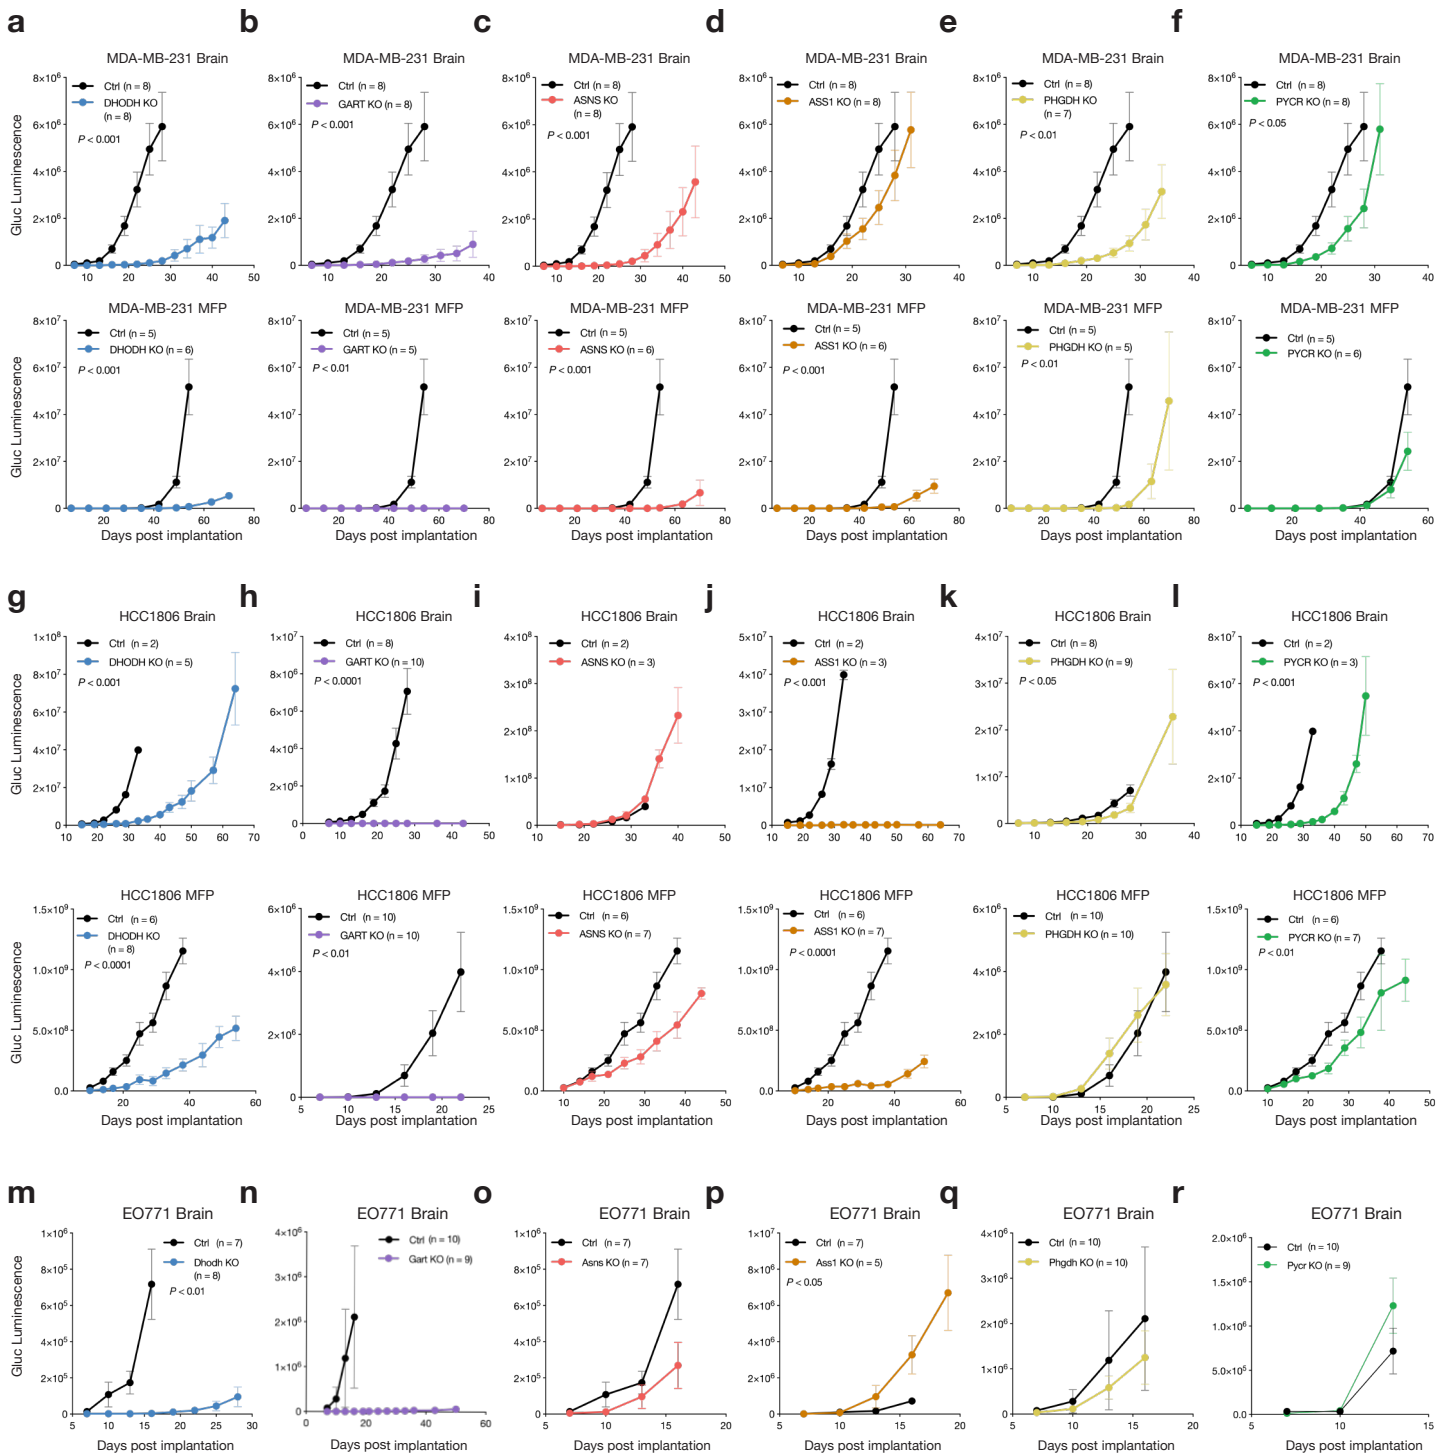

# Extended Data Figure 11

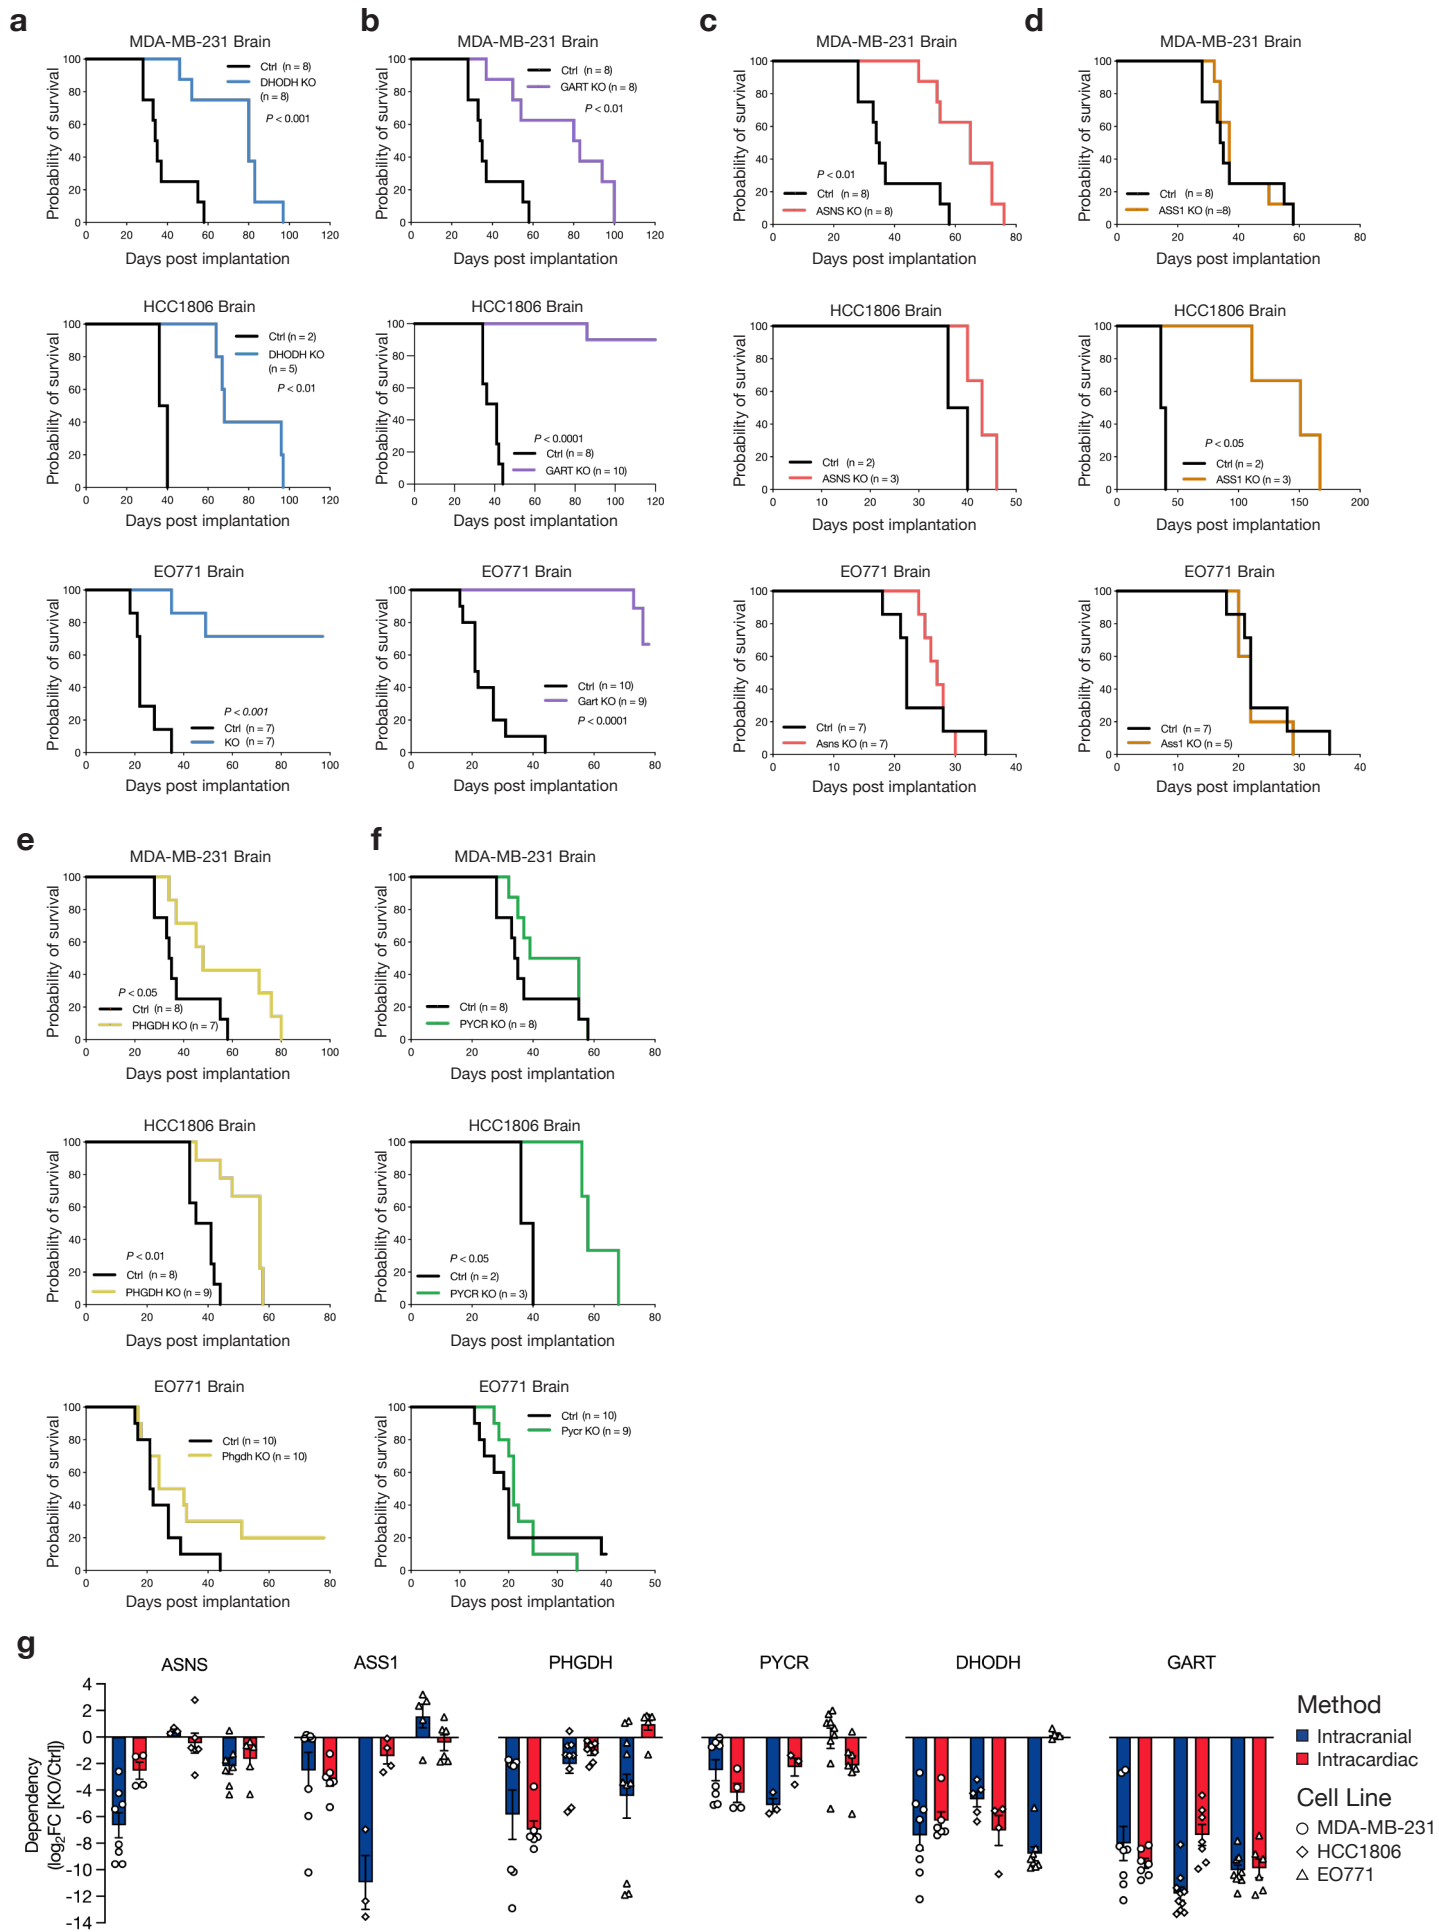

# Extended Data Figure 12

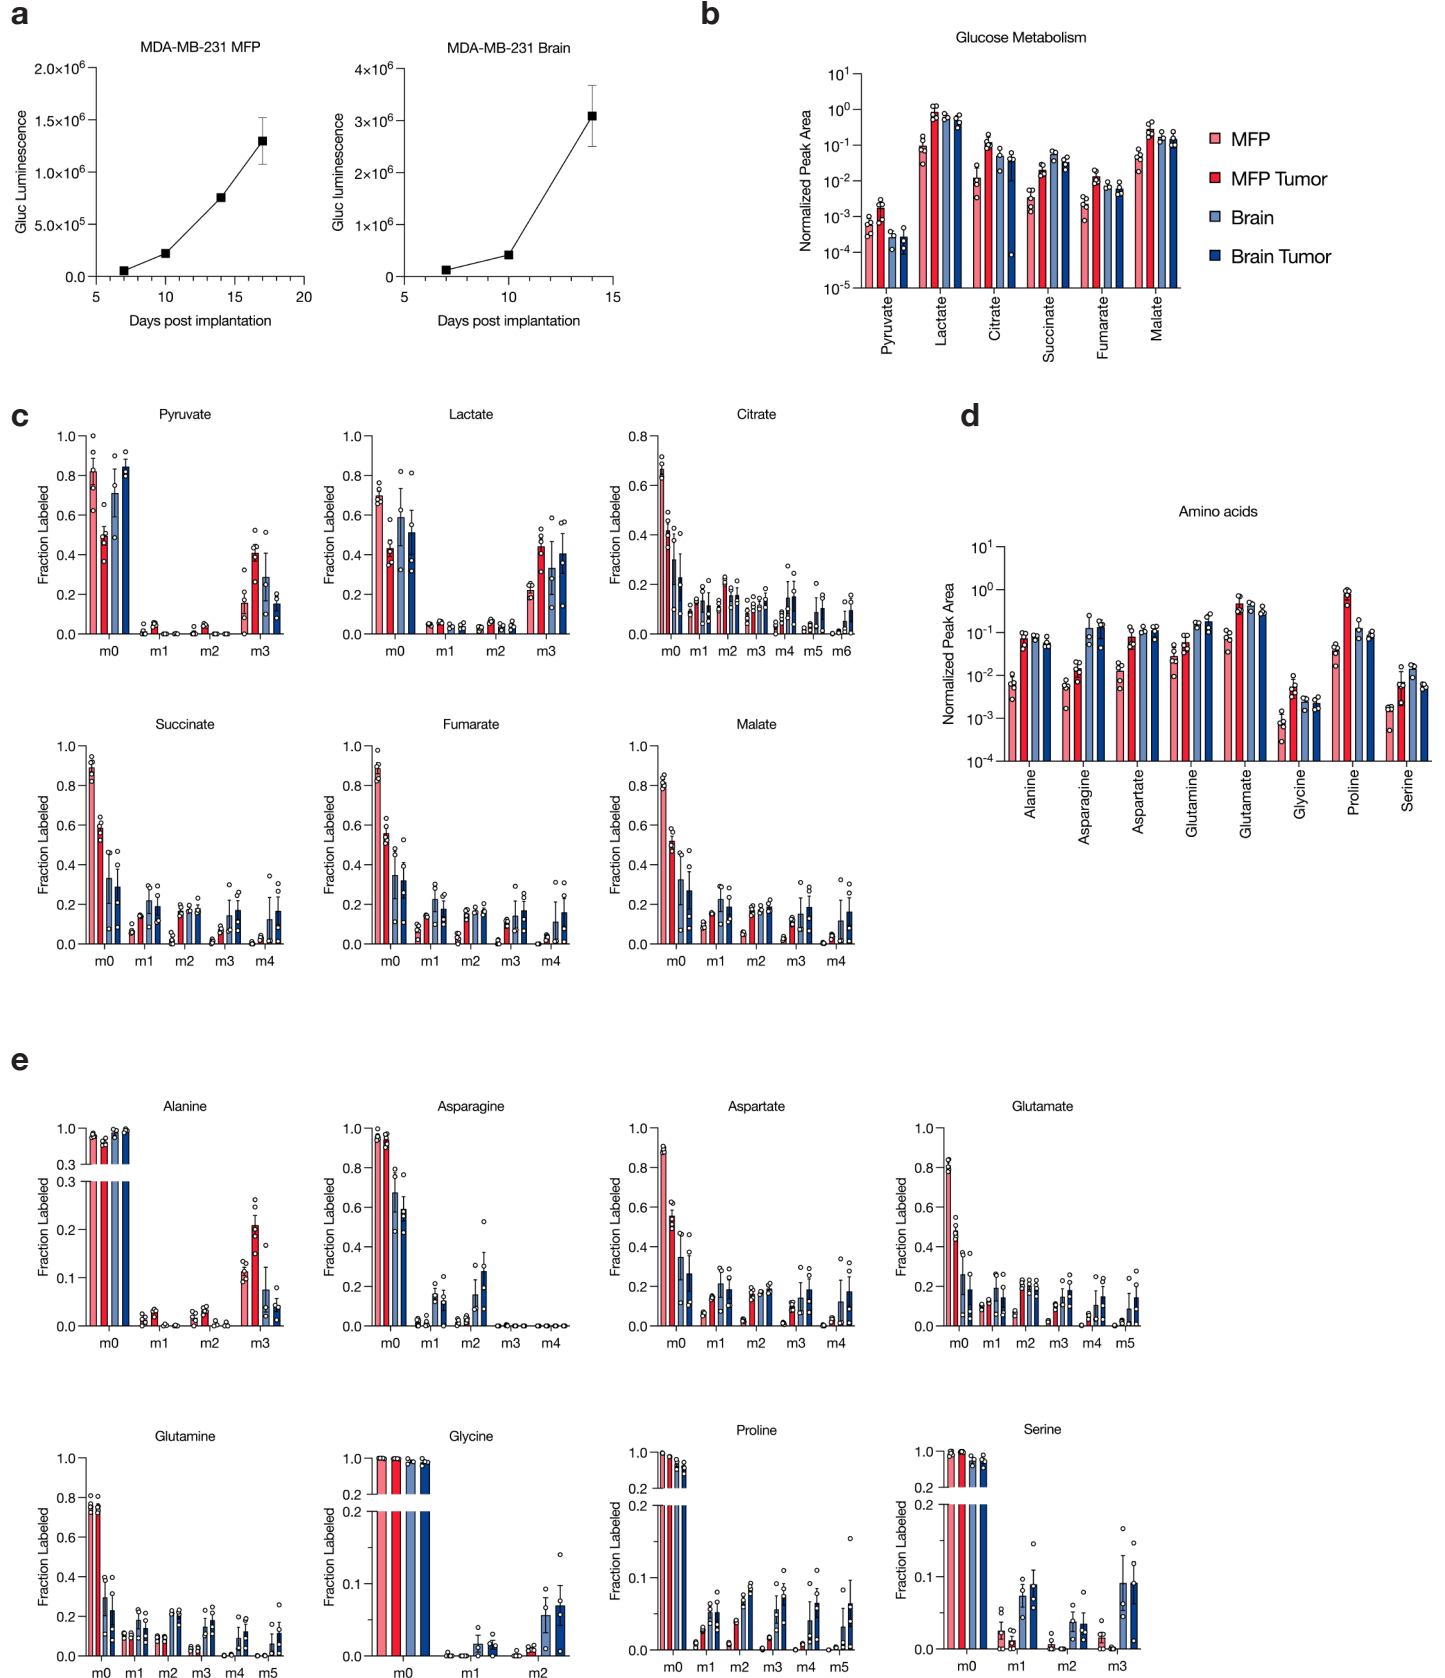



# Extended Data Figure 14

**a**

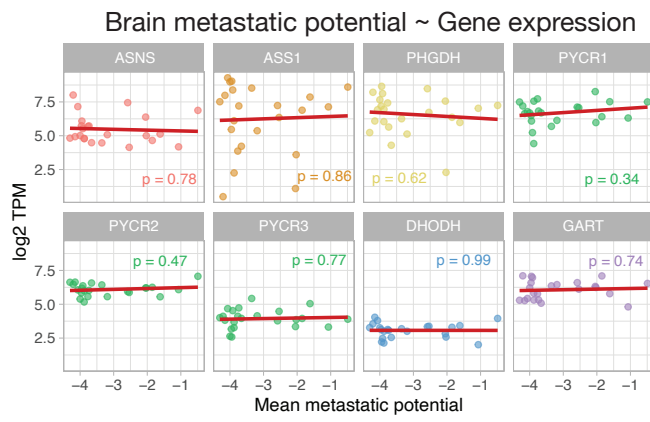

**b**

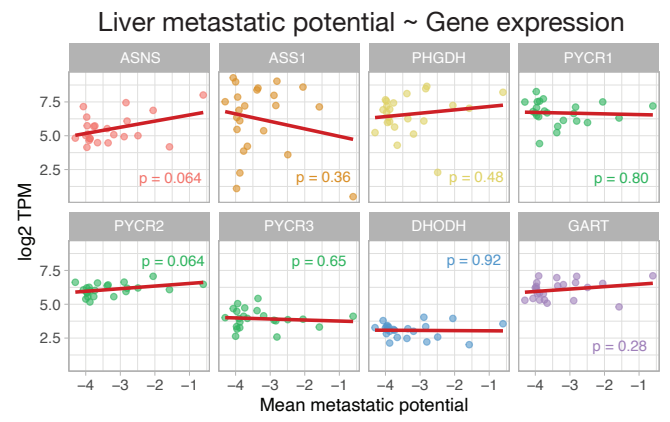

**c**

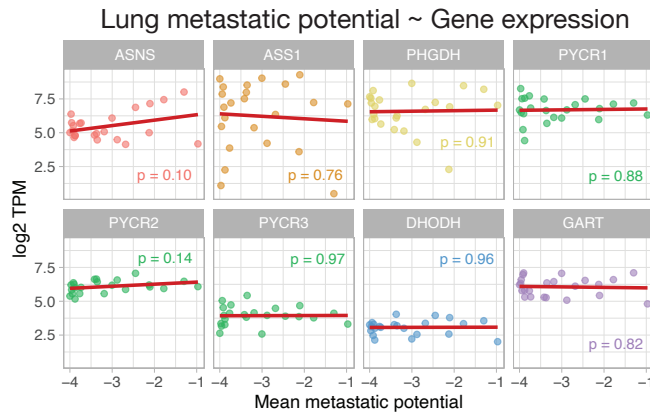

**d**

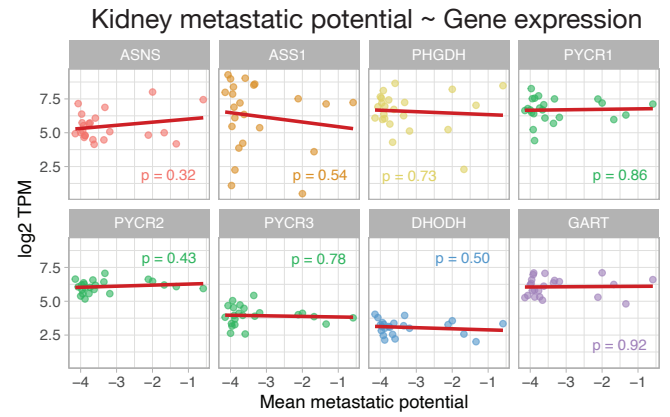

**e**

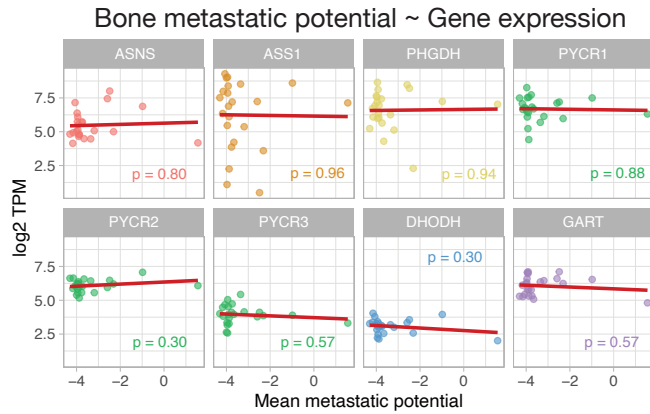

# Extended Data Figure 15

**a** Brain metastatic potential ~ Gene dependency

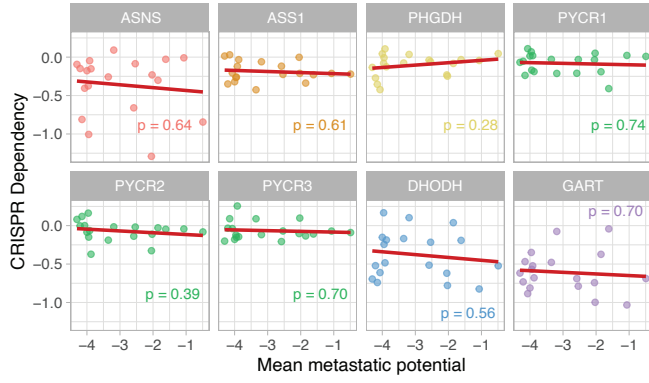

**b** Liver metastatic potential ~ Gene dependency

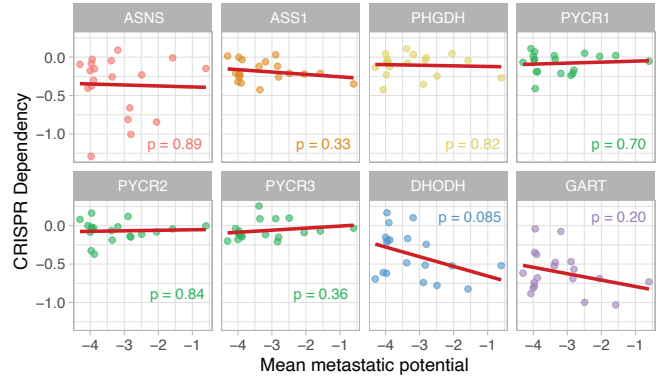

**c** Kidney metastatic potential ~ Gene dependency

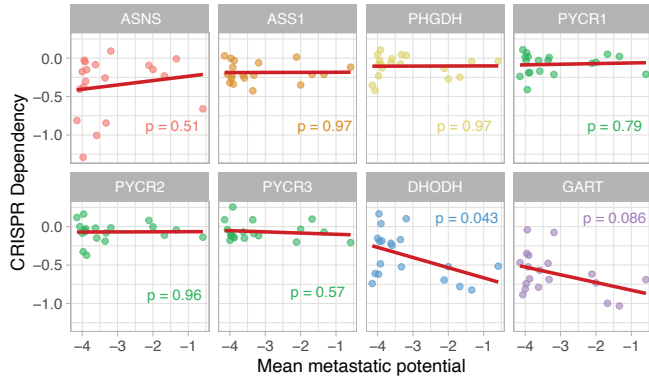

**d** Bone metastatic potential ~ Gene dependency

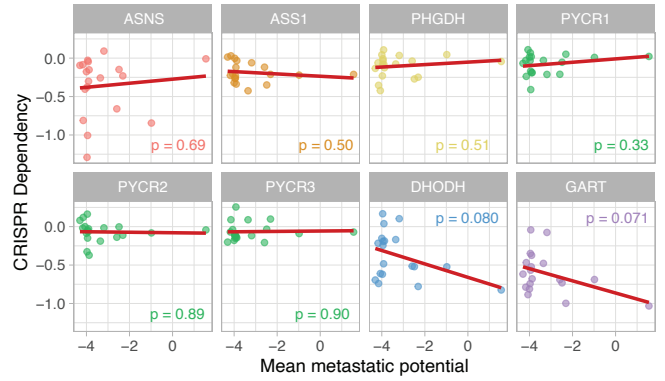

Supplement: media-1.pdf [file media-1.pdf]
